# Supplementary material for: Assessment of the Association of Vitamin D Level With SARS-CoV-2 Seropositivity Among Working-Age Adults
Source: PubMed Central journal article supplement — JAMA Netw Open. 2021 May 19;4(5):e2111634. doi: 10.1001/jamanetworkopen.2021.11634 (PMC8135000; doi:10.1001/jamanetworkopen.2021.11634), 2021-05-19

## Supplemental Online Content

Li Y, Tong CH, Bare LA, Devlin JJ. Assessment of the association of vitamin D level with SARS-CoV-2 seropositivity among working-age adults. *JAMA Netw Open*. 2021;4(5):e2111634. doi:10.1001/jamanetworkopen.2021.11634

**eTable 1.** Characteristics of the Individuals in the Study According to Vitamin D Levels Before COVID-19 Pandemic (September 2019 to January 2020): <30 vs.  $\geq$ 30 ng/mL

**eTable 2.** Characteristics of the Individuals in the Study According to Vitamin D Levels Before COVID-19 Pandemic (September 2019 to January 2020): <20 vs.  $\geq$ 20 ng/mL

**eTable 3.** Characteristics of the Individuals Included in the Study vs. Those Excluded From the Study Because of No SARS-CoV-2 Serology Testing (August 2020 to November 2020)

**eFigure.** Distributions of Propensity Scores Before and After Matching

This supplemental material has been provided by the authors to give readers additional information about their work.

**eTable 1.** Characteristics of the Individuals in the Study According to Vitamin D Levels Before COVID-19 Pandemic (September 2019 to January 2020): <30 vs. ≥30 ng/mL

| Characteristic <sup>a</sup> | Total<br>n=18,148 | Vitamin D <30<br>ng/mL <sup>b</sup><br>n=10,876 | Vitamin D ≥30<br>ng/mL <sup>b</sup><br>n=7272 | P value | Standardized<br>difference |
|-----------------------------|-------------------|-------------------------------------------------|-----------------------------------------------|---------|----------------------------|
| Age                         |                   |                                                 |                                               |         |                            |
| ≥60 y                       | 2926 (16.1)       | 1269 (11.7)                                     | 1657 (22.8)                                   | <.001   | .30                        |
| <60 y                       | 15,222 (83.9)     | 9607 (88.3)                                     | 5615 (77.2)                                   |         |                            |
| Sex                         |                   |                                                 |                                               |         |                            |
| Male                        | 5978 (32.9)       | 3601 (33.1)                                     | 2377 (32.7)                                   | .55     | .009                       |
| Female                      | 12,170 (67.1)     | 7275 (66.9)                                     | 4895 (67.3)                                   |         |                            |
| Race                        |                   |                                                 |                                               |         |                            |
| Asian                       | 3026 (17.0)       | 2020 (19.0)                                     | 1006 (14.1)                                   | <.001   | .46                        |
| Black                       | 3035 (17.1)       | 2192 (20.6)                                     | 843 (11.8)                                    |         |                            |
| Hispanic                    | 2439 (13.7)       | 1748 (16.4)                                     | 691 (9.7)                                     |         |                            |
| Other <sup>c</sup>          | 1482 (8.3)        | 939 (8.8)                                       | 543 (7.6)                                     |         |                            |
| White                       | 7785 (43.8)       | 3736 (35.1)                                     | 4049 (56.8)                                   |         |                            |
| Education                   |                   |                                                 |                                               |         |                            |
| No college degree           | 8246 (46.6)       | 5298 (50.3)                                     | 2948 (41.2)                                   | <.001   | .18                        |
| College degree              | 9452 (53.4)       | 5238 (49.7)                                     | 4214 (58.8)                                   |         |                            |
| BMI                         |                   |                                                 |                                               |         |                            |
| ≥30 kg/m <sup>2</sup>       | 6861 (37.9)       | 4700 (43.3)                                     | 2161 (29.7)                                   | <.001   | .28                        |
| <30 kg/m <sup>2</sup>       | 11,265 (62.1)     | 6162 (56.7)                                     | 5103 (70.3)                                   |         |                            |
| Blood pressure              |                   |                                                 |                                               |         |                            |
| High                        | 7886 (43.5)       | 4859 (44.7)                                     | 3027 (41.7)                                   | <.001   | .06                        |
| Elevated                    | 2818 (15.5)       | 1667 (15.3)                                     | 1151 (15.8)                                   |         |                            |
| Normal                      | 7427 (41.0)       | 4342 (40.0)                                     | 3085 (42.5)                                   |         |                            |
| Smoking                     |                   |                                                 |                                               |         |                            |
| Yes                         | 2238 (12.3)       | 1486 (13.7)                                     | 752 (10.3)                                    | <.001   | .10                        |
| No                          | 15,895 (87.7)     | 9379 (86.3)                                     | 6516 (89.7)                                   |         |                            |
| Geographical location       |                   |                                                 |                                               |         |                            |
| Northeast                   | 3937 (21.8)       | 2335 (21.6)                                     | 1602 (22.2)                                   | <.001   | .07                        |
| Midwest                     | 2835 (15.7)       | 1627 (15.1)                                     | 1208 (16.7)                                   |         |                            |
| West                        | 4195 (23.3)       | 2638 (24.4)                                     | 1557 (21.5)                                   |         |                            |
| South                       | 7057 (39.2)       | 4196 (38.9)                                     | 2861 (39.6)                                   |         |                            |
| COVID-19 serology           |                   |                                                 |                                               |         |                            |
| Positive                    | 900 (5.0)         | 611 (5.6)                                       | 289 (4.0)                                     | <.001   | .08                        |
| Negative                    | 17,248 (95.0)     | 10,265 (94.4)                                   | 6983 (96.0)                                   |         |                            |

<sup>a</sup>Body mass index, blood pressure, and smoking status were determined during a biometric screening program that took place from September 2019 to January 2020

<sup>b</sup>Data shown are the counts (percentage)

<sup>c</sup>American Indian or Alaska Native, Native Hawaiian or other Pacific Islander, or 2 or more ethnicities

**eTable 2.** Characteristics of the Individuals in the Study According to Vitamin D Levels Before COVID-19 Pandemic (September 2019 to January 2020): <20 vs. ≥20 ng/mL

| Characteristic <sup>a</sup> | Total<br>n=18,148 | Vitamin D <20<br>ng/mL <sup>b</sup><br>n=4498 | Vitamin D ≥20<br>ng/mL <sup>b</sup><br>n=13,650 | P value | Standardized<br>difference |
|-----------------------------|-------------------|-----------------------------------------------|-------------------------------------------------|---------|----------------------------|
| Age                         |                   |                                               |                                                 |         |                            |
| ≥60 y                       | 2926 (16.1)       | 378 (8.4)                                     | 2548 (18.7)                                     | <.001   | .30                        |
| <60 y                       | 15,222<br>(83.9)  | 4120 (91.6)                                   | 11102 (81.3)                                    |         |                            |
| Sex                         |                   |                                               |                                                 |         |                            |
| Male                        | 5978 (32.9)       | 1426 (31.7)                                   | 4552 (33.3)                                     | .04     | .04                        |
| Female                      | 12,170<br>(67.1)  | 3072 (68.3)                                   | 9098 (66.7)                                     |         |                            |
| Race                        |                   |                                               |                                                 |         |                            |
| Asian                       | 3026 (17.0)       | 847 (19.2)                                    | 2179 (16.3)                                     | <.001   | .58                        |
| Black                       | 3035 (17.1)       | 1279 (29.0)                                   | 1756 (13.2)                                     |         |                            |
| Hispanic                    | 2439 (13.7)       | 767 (17.4)                                    | 1672 (12.5)                                     |         |                            |
| Other <sup>c</sup>          | 1482 (8.3)        | 411 (9.3)                                     | 1071 (8.0)                                      |         |                            |
| White                       | 7785 (43.8)       | 1110 (25.1)                                   | 6675 (50.0)                                     |         |                            |
| Education                   |                   |                                               |                                                 |         |                            |
| No college degree           | 8246 (46.6)       | 2368 (54.9)                                   | 5878 (43.9)                                     | <.001   | .22                        |
| College degree              | 9452 (53.4)       | 1944 (45.1)                                   | 7508 (56.1)                                     |         |                            |
| BMI                         |                   |                                               |                                                 |         |                            |
| ≥30 kg/m <sup>2</sup>       | 6861 (37.9)       | 2294 (51.1)                                   | 4567 (33.5)                                     | <.001   | .36                        |
| <30 kg/m <sup>2</sup>       | 11,265<br>(62.1)  | 2197 (48.9)                                   | 9068 (66.5)                                     |         |                            |
| Blood pressure              |                   |                                               |                                                 |         |                            |
| High                        | 7886 (43.5)       | 2170 (48.3)                                   | 5716 (41.9)                                     | <.001   | .13                        |
| Elevated                    | 2818 (15.5)       | 642 (14.3)                                    | 2176 (16.0)                                     |         |                            |
| Normal                      | 7427 (41.0)       | 1681 (37.4)                                   | 5746 (42.1)                                     |         |                            |
| Smoking                     |                   |                                               |                                                 |         |                            |
| Yes                         | 2238 (12.3)       | 729 (16.2)                                    | 1509 (11.1)                                     | <.001   | .15                        |
| No                          | 15,895<br>(87.7)  | 3765 (83.8)                                   | 12,130 (88.9)                                   |         |                            |
| Geographical location       |                   |                                               |                                                 |         |                            |
| Northeast                   | 3937 (21.8)       | 824 (18.4)                                    | 3113 (23.0)                                     | <.001   | .12                        |
| Midwest                     | 2835 (15.7)       | 690 (15.4)                                    | 2145 (15.8)                                     |         |                            |
| West                        | 4195 (23.3)       | 1087 (24.3)                                   | 3108 (22.9)                                     |         |                            |
| South                       | 7057 (39.2)       | 1874 (41.9)                                   | 5183 (38.3)                                     |         |                            |
| COVID-19 serology           |                   |                                               |                                                 |         |                            |
| Positive                    | 900 (5.0)         | 290 (6.4)                                     | 610 (4.5)                                       | <.001   | .09                        |
| Negative                    | 17,248<br>(95.0)  | 4208 (93.6)                                   | 13,040 (95.5)                                   |         |                            |

<sup>a</sup>Body mass index, blood pressure, and smoking status were determined during a biometric screening program that took place from September 2019 to January 2020

<sup>b</sup>Data shown are the counts (percentage)

<sup>c</sup>American Indian or Alaska Native, Native Hawaiian or other Pacific Islander, or 2 or more ethnicities

**eTable 3.** Characteristics of the Individuals Included in the Study vs. Those Excluded From the Study Because of No SARS-CoV-2 Serology Testing (August 2020 to November 2020)

| Characteristic <sup>a</sup> | Excluded for no SARA-CoV-2 serology testing <sup>b</sup><br>n=8347 | Included in the final analysis <sup>b</sup><br>n=18,148 | P value | Standardized difference |
|-----------------------------|--------------------------------------------------------------------|---------------------------------------------------------|---------|-------------------------|
| Age                         |                                                                    |                                                         |         |                         |
| ≥60 y                       | 1491 (17.9)                                                        | 2926 (16.1)                                             | <.001   | .04                     |
| <60 y                       | 6854 (82.1)                                                        | 15,222 (83.9)                                           |         |                         |
| Sex                         |                                                                    |                                                         |         |                         |
| Male                        | 2657 (31.8)                                                        | 5978 (32.9)                                             | .07     | .02                     |
| Female                      | 5690 (68.2)                                                        | 12,170 (67.1)                                           |         |                         |
| Race                        |                                                                    |                                                         |         |                         |
| Asian                       | 1193 (17.0)                                                        | 3026 (17.0)                                             | <.001   | .10                     |
| Black                       | 1440 (20.5)                                                        | 3035 (17.1)                                             |         |                         |
| Hispanic                    | 865 (12.3)                                                         | 2439 (13.7)                                             |         |                         |
| Other <sup>c</sup>          | 631 (9.0)                                                          | 1482 (8.3)                                              |         |                         |
| White                       | 2897 (41.2)                                                        | 7785 (43.8)                                             |         |                         |
| Education                   |                                                                    |                                                         |         |                         |
| No college degree           | 4207 (52.8)                                                        | 8246 (46.6)                                             | <.001   | .13                     |
| College degree              | 3755 (47.2)                                                        | 9452 (53.4)                                             |         |                         |
| BMI                         |                                                                    |                                                         |         |                         |
| ≥30 kg/m <sup>2</sup>       | 3152 (37.8)                                                        | 6998 (38.6)                                             | .21     | .02                     |
| <30 kg/m <sup>2</sup>       | 5185 (62.2)                                                        | 11,129 (61.4)                                           |         |                         |
| Blood pressure              |                                                                    |                                                         |         |                         |
| High                        | 4062 (48.8)                                                        | 8677 (47.9)                                             | .35     | .02                     |
| Elevated                    | 1195 (14.4)                                                        | 2682 (14.8)                                             |         |                         |
| Normal                      | 3068 (36.9)                                                        | 6765 (37.3)                                             |         |                         |
| Smoking                     |                                                                    |                                                         |         |                         |
| Cotinine detected           | 872 (10.4)                                                         | 1773 (9.8)                                              | .09     | .02                     |
| Cotinine not detected       | 7475 (89.6)                                                        | 16,375 (90.2)                                           |         |                         |
| Geographical location       |                                                                    |                                                         |         |                         |
| Northeast                   | 1559 (20.4)                                                        | 3925 (21.8)                                             | .004    | .05                     |
| Midwest                     | 1325 (17.3)                                                        | 2833 (15.7)                                             |         |                         |
| West                        | 1778 (23.3)                                                        | 4191 (23.3)                                             |         |                         |
| South                       | 2982 (39.0)                                                        | 7075 (39.3)                                             |         |                         |
| Vitamin D (2020)            |                                                                    |                                                         |         |                         |
| <30 ng/ml                   | 5078 (60.8)                                                        | 10,595 (58.4)                                           | <.001   | .05                     |
| ≥30 ng/ml                   | 3269 (39.2)                                                        | 7553 (41.6)                                             |         |                         |
| <20 ng/ml                   | 2260 (27.1)                                                        | 4424 (24.4)                                             | <.001   | .06                     |
| ≥20 ng/ml                   | 6087 (72.9)                                                        | 13724 (75.6)                                            |         |                         |

<sup>a</sup>Body mass index, blood pressure, and smoking status were determined during a biometric screening program that took place from August 2020 to November 2020

<sup>b</sup>Data shown are the counts (percentage)

<sup>c</sup>American Indian or Alaska Native, Native Hawaiian or other Pacific Islander, or 2 or more ethnicities

**eFigure.** Distributions of Propensity Scores Before and After Matching

The C-statistic for the matched propensity score model was 0.73 in panel A, 0.70 in panel B, 0.71 in panel C, and 0.69 in panel D.

**A.** Top: 2019 VitD <20 ng/mL; Bottom: 2019 VitD ≥20 ng/ml

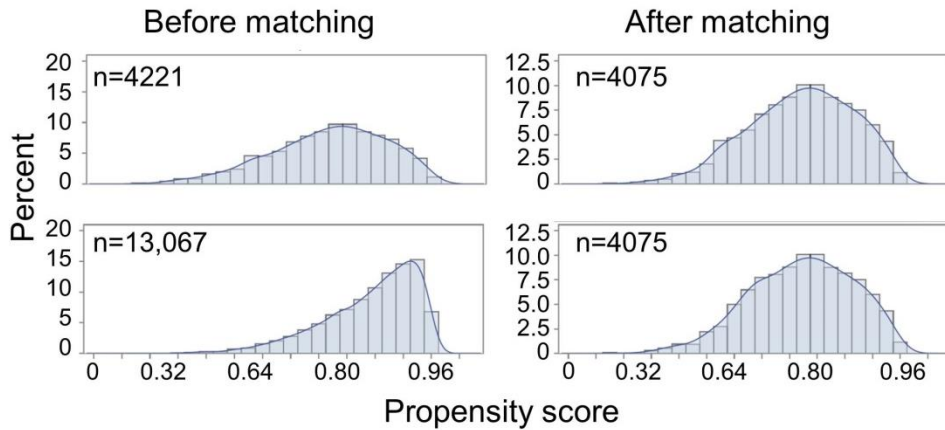

**B.** Top: 2019 VitD <30 ng/mL; Bottom: 2019 VitD ≥30 ng/ml

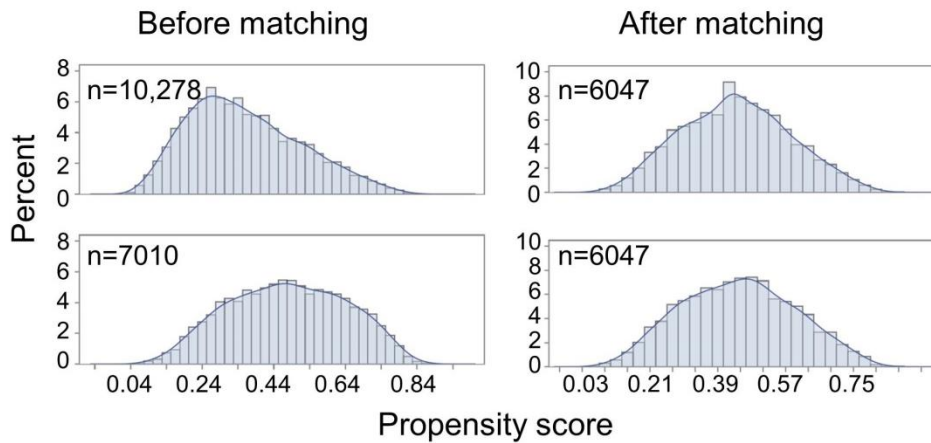

C. Top: 2020 VitD <20 ng/mL; Bottom: 2020 VitD ≥20 ng/ml

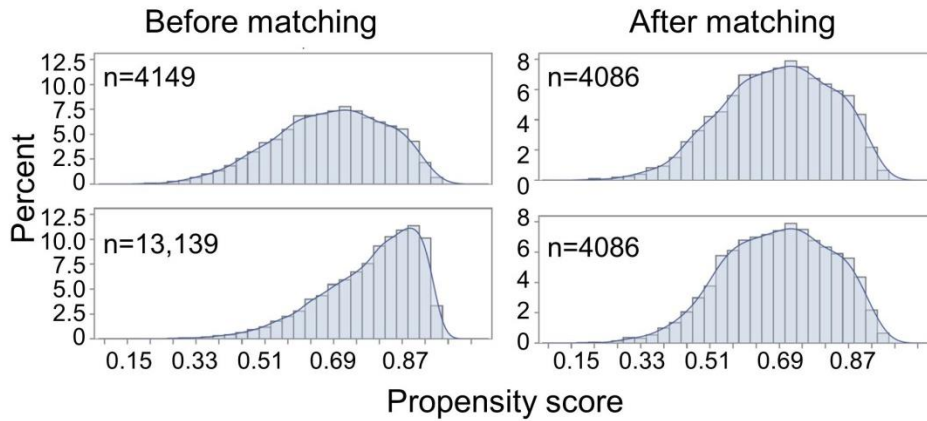

D. Top: 2020 VitD <30 ng/mL; Bottom: 2020 VitD ≥30 ng/ml

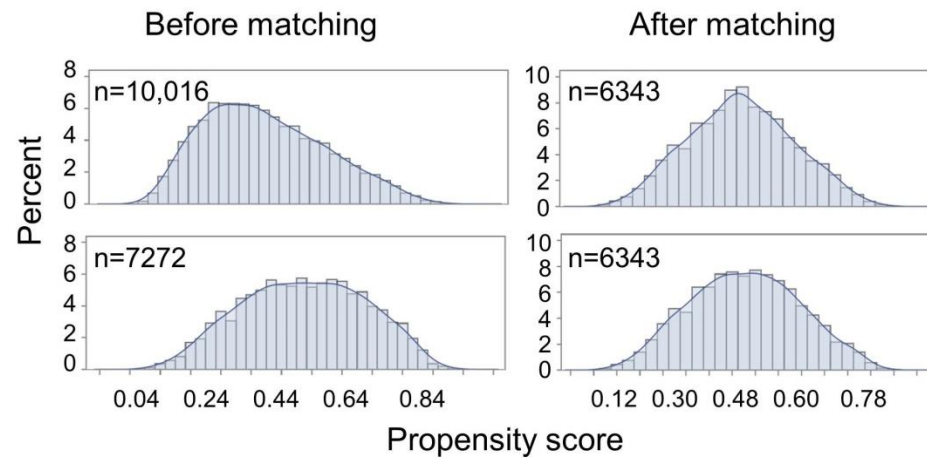

Supplement: jamanetwopen-e2111634-s001.pdf [file jamanetwopen-e2111634-s001.pdf]
